# Supplementary material
Source: Springer Nature journal article supplement (https://www.springermedizin.de/resource/supplementary/12955_2008_531_MOESM3_ESM.pdf/9560650)
Supplement: MOESM3 [file 9560650]

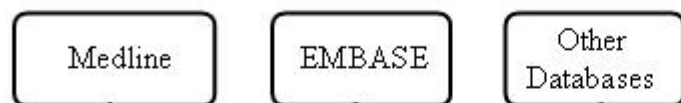

2540 articles to review titles & abstracts

26 articles to review full texts

*14 articles excluded:*

- 6 – applied qualitative methodologies
- 2 – assessed one single-dimension of HRQL
- 1 – used modified SF-36 without validation
- 1 – used one single question from an instrument
- 1 – instrument could not be located
- 1 – earlier version of one duplicated study
- 2 – duplicated studies reported different outcomes

12 studies included

Reference lists  
0 study found

12 original studies included
